# Supplementary material for: Impact of Three Nutrition Incentive Levels on Fruit and Vegetable Purchasing, Consumption, and Food Security: A 12-month Randomized Control Trial with 6-month Follow-Up
Source: Research Square preprint supplement (doi:10.21203/rs.3.rs-8439767/v1), 2026-01-12
Supplement: Supplementary file 1 [file 49a81f3d397f44e32cfe865e.docx]

## Supplemental eTable 1: Enrollment and Baseline Characteristics among All Participants, by Utilization Category (N=3,290)

|  | **All Participants (N=3,290)** | **Used Card < 3 Months (n=1,881)** | **Used Card ≥ 3 Months (n=1,409)** | **P- Value** |
| --- | --- | --- | --- | --- |
| **Survey Completion** |  |  |  | <0.01 |
| Baseline | 3,290(100) | 1,881(100) | 1,409(100) |
| 6 months | 830(25) | 108(6) | 722(51) |
| 12 months | 679(21) | 97(5) | 582(41) |
| 18 months (6-month follow-up) | 371(11) | 52(3) | 319(23) |
| **Study Group** |  |  |  | <0.01 |
| $10/month | 1149 (35) | 740 (39) | 409 (29) |
| $20/month | 1076 (33) | 612 (33) | 464 (33) |
| $40/month | 1065 (32) | 529 (28) | 536 (38) |
| **Year Enrolled** |  |  |  | <0.01 |
| 2017 | 1,152 (35) | 722 (38) | 430 (31) |
| 2018 | 1,114 (34) | 619 (33) | 495 (35) |
| 2019 | 1,024 (31) | 540 (29) | 484 (34) |
| **County** |  |  |  | 0.016 |
| Orange | 892 (27) | 496 (26) | 396 (28) |
| Los Angeles | 1,077 (33) | 654 (35) | 423 (30) |
| San Diego | 1,321 (40) | 731 (39) | 590 (42) |
| **Age,** mean (SD), years | 41.2 (12.5) | 40.9 (12.7) | 41.6 (12.1) | 0.10 |
| **Gender** |  |  |  | 0.53 |
| Male | 337 (10) | 198 (11) | 139 (10) |
| Female | 2,952 (90) | 1,682 (89) | 1,270 (90) |
| **Race/Ethnicity** |  |  |  | 0.61 |
| Latino, Mexican origin | 2,658 (81) | 1,507 (80) | 1,151 (82) |
| Latino, non-Mexican origin | 336 (10) | 193 (10) | 143 (10) |
| White, non-Hispanic | 128 (4) | 79 (4) | 49 (3) |
| Black, non-Hispanic | 77 (2) | 49 (3) | 28 (2) |
| Other race/Unknown | 91 (3) | 53 (3) | 38 (3) |
| **Primarily Spanish Speaking** |  |  |  | 0.70 |
| Yes | 2,471 (75) | 1,408 (75) | 1,063 (75) |
| No | 819 (25) | 473 (25) | 346 (25) |
| **Educational Attainment** |  |  |  | 0.20 |
| Less than high school | 2,044 (62) | 1,186 (63) | 858 (61) |
| High school/GED or more | 1,246 (38) | 695 (37) | 551 (39) |
| **Household Size,** mean (SD), no. of people | 4.6 (2.3) | 4.6 (2.5) | 4.6 (2.2) | 0.26 |
| **Children in Household** |  |  |  | 0.88 |
| Yes | 2,651 (81) | 1,514 (80) | 1,137 (81) |
| No | 639 (19) | 367 (20) | 272 (19) |
| **SNAP received per month**,mean (SD), US$ | 310 (167) | 301 (167) | 320 (166) | 0.002 |
| **General Grocery Shopping Frequency** |  |  |  | 0.045 |
| 2 times per month or less | 377 (11) | 230 (13) | 147 (11) |
| 1-2 times per week | 1,496 (45) | 822 (44) | 674 (48) |
| 3 or more times per week | 1,412 (43) | 825 (44) | 587 (42) |
| Missing | 382 (12) | 234 (12) | 148 (11) |
| **Food Security** |  |  |  | 0.012 |
| High/marginal food security | 697 (21) | 370 (20) | 327 (23) |
| Low food security | 1,353 (41) | 768 (41) | 585 (42) |
| Very low food security | 1,179 (36) | 708 (38) | 471 (33) |
| Missing | 758 (23) | 405 (22) | 353 (25) |
| **F&V Consumption**a,mean (SD), cup-equivalents/day | 2.9 (0.9) | 2.9 (0.9) | 3.0 (0.9) | 0.20 |
| **Mean Fruit and Vegetable Barriers Score (Range: 1-5)** | 2.4 (0.7) | 2.4 (0.7) | 2.3 (0.7) | 0.031 |
| **Individual Fruit and Vegetable Barriers Items: Agree or Strongly Agree (vs. Disagree or Strongly Disagree)** |  |  |  |  |
| It's hard for me to eat more vegetables because I don't know how to prepare them | 600 (18) | 344 (18) | 256 (18) | 0.14 |
| It's hard for me to eat more fruits because I don't know how to prepare them | 416 (13) | 253 (13) | 163 (12) | 0.11 |
| I don't eat F&V as much as I like to because they cost too much | 1956 (59) | 1133 (60) | 823 (58) | 0.33 |
| I don't eat F&V as much as I like to because they often spoil before I get a chance to eat them | 962 (29) | 570 (30) | 392 (28) | 0.12 |
| I don't eat F&V as much as I like to because *my family* doesn't like them | 413 (13) | 240 (13) | 173 (12) | 0.70 |
| I don't eat F&V as much as I like to because Idon't like them | 228 (7) | 145 (8) | 83 (6) | 0.04 |

**aF&V Consumption** = Predicted intake of F&V including legumes and excluding French fries (cup equivalents) per day from the 9-item EATS screener

**Supplemental eFigure 2: Difference in Estimated Marginal Effects from Baseline for Fruit & Vegetable Consumption over Time**

| **F&V CONSUMPTION** | **Baseline** | **6 Months** | **12 Months** | **18 Months** |
| --- | --- | --- | --- | --- |
| **$10 Group** |  |  |  |  |
| Estimated Marginal Effects (95% Confidence Interval [CI]) | 2.95  (2.86 to 3.05) | 3.04  (2.88 to 3.21) | 2.89  (2.73 to 3.05) | 2.93  (2.83 to 3.02) |
| Difference from Baseline (95% CI) | 0.00  (-0.1 to 0.09) | 0.09  (-0.17 to 0.17) | -0.06  (-0.16 to 0.16) | -0.02  (-0.09 to 0.09) |
| **$20 Group** |  |  |  |  |
| Estimated Marginal Effects (95% CI) | 3.01  (2.93 to 3.08) | 3.10  (2.97 to 3.22) | 2.96  (2.86 to 3.06) | 2.99  (2.75 to 3.23) |
| Difference from Baseline (95% CI) | 0.00  (-0.08 to 0.07) | 0.09  (-0.13 to 0.13) | -0.05  (-0.10 to 0.10) | -0.02  (-0.24 to 0.24) |
| **$40 Group** |  |  |  |  |
| Estimated Marginal Effects (95% CI) | 2.92  (2.83 to 3.01) | 3.04  (2.97 to 3.11) | 3.04  (2.98 to 3.10) | 2.91  (2.82 to 3.00) |
| Difference from Baseline (95% CI) | 0.00  (-0.09 to 0.09) | 0.12  (-0.07 to 0.07) | 0.12  (-0.06 to 0.06) | -0.01  (-0.09 to 0.09) |

Estimated marginal effects and differences are reported in cup equivalents of fruit and vegetable intake.

### **Supplemental eFigure 2: Difference in Estimated Marginal Effects from Baseline of Having Low/Very Low Food Security over Time**

| **FOOD SECURITY** | **Baseline** | **6 Months** | **12 Months** | **18 Months** |
| --- | --- | --- | --- | --- |
| **$10 Group** |  |  |  |  |
| Estimated Marginal Effects (95% CI) | 0.72  (0.65-0.80) | 0.68  (0.60-0.76) | 0.69  (0.64-0.73) | 0.62  (0.51-0.73) |
| Difference from Baseline (95% CI) | 0.00  (-0.08 to 0.08) | -0.04  (-0.08 to 0.08) | -0.03  (-0.05 to 0.05) | -0.10  (-0.11 to 0.11) |
| **$20 Group** |  |  |  |  |
| Estimated Marginal Effects (95% CI) | 0.78  (0.76-0.81) | 0.68  (0.63-0.73) | 0.66  (0.62-0.69) | 0.67  (0.63-0.71) |
| Difference from Baseline (95% CI) | 0.00  (-0.02 to 0.02) | -0.10  (-0.05 to 0.05) | -0.12  (-0.04 to 0.04) | -0.11  (-0.04 to 0.04) |
| **$40 Group** |  |  |  |  |
| Estimated Marginal Effects (95% CI) | 0.77  (0.76-0.79) | 0.73  (0.66-0.79) | 0.64  (0.57-0.70) | 0.68  (0.62-0.75) |
| Difference from Baseline (95% CI) | 0.00  (-0.09 to 0.09) | -0.04  (-0.06 to 0.06) | -0.13  (-0.07 to 0.07) | -0.09  (-0.06 to 0.06) |

**Supplemental eTable 2: Program Satisfaction, Understanding, and Utilization of the ¡Más Fresco! More Fresh Programa (n=722)**

|  | **All Participants (n=722)** | **$10 Group (n=208)** | **$20 Group (n=241)** | **$40 Group (n=273)** | **P- Value** |
| --- | --- | --- | --- | --- | --- |
| **Overall, how satisfied were you with the program?** |  |  |  |  | 0.001 |
| Very satisfied/satisfied | 656 (91) | 175 (84) | 226 (94) | 255 (93) |
| Neutral/Dissatisfied/Very Dissatisfied | 48 (7) | 25 (12) | 10 (4) | 13 (5) |
| Missing | 18 (2) | 8 (4) | 5 (2) | 5 (2) |
|  |  |  |  |  |  |
| **How easy or difficult was it to…** |  |  |  |  |  |
| **Understand how the program works?** |  |  |  |  | 0.36 |
| Very easy/Easy | 465 (64) | 132 (63) | 163 (68) | 170 (62) |
| Very difficult/Difficult/Neutral | 249 (34) | 72 (35) | 75 (31) | 102 (37) |
| Don't know/Prefer not to answer | 8 (1) | 4 (2) | 3 (1) | 1 (0) |
| **Remember to use your Mi Familia card each time you made a purchase at Northgate Markets?** |  |  |  |  | 0.41 |
| Very easy/Easy | 540 (75) | 149 (72) | 186 (77) | 205 (75) |
| Very difficult/Difficult/Neutral | 172 (24) | 55 (26) | 51 (21) | 66 (24) |
| Don't know/Prefer not to answer | 10 (1) | 4 (2) | 4 (2) | 2 (1) |
| **Remember which F&V were eligible to earn incentive dollars?** |  |  |  |  | 0.55 |
| Very easy/Easy | 391 (54) | 107 (51) | 135 (56) | 149 (55) |
| Very difficult/Difficult/Neutral | 300 (42) | 89 (43) | 92 (38) | 119 (44) |
| Don't know/Prefer not to answer | 31 (4) | 12 (6) | 14 (6) | 5 (2) |
| **Keep track of the incentive dollars you earned from the program?** |  |  |  |  | 0.22 |
| Very easy/Easy | 392 (54) | 105 (50) | 140 (58) | 147 (54) |
| Very difficult/Difficult/Neutral | 302 (42) | 94 (45) | 90 (37) | 118 (43) |
| Don't know/Prefer not to answer | 28 (4) | 9 (4) | 11 (5) | 8 (3) |
| **Did you usually use your Mi Familia card or enter your phone number into the keypad?** |  |  |  |  | 0.45 |
| I usually use my Mi Familia card | 625 (87) | 177 (85) | 205 (85) | 243 (89) |
| I usually enter my phone number | 36 (5) | 11 (5) | 13 (5) | 12 (4) |
| I do both equally | 35 (5) | 8 (4) | 15 (6) | 12 (4) |
| Don't know/Prefer not to answer | 26 (4) | 12 (6) | 8 (3) | 6 (2) |

aProgram satisfaction was administered at the 6- and 12-month assessment. Results represented in the table are from participants who used the program at least 3 out of 12 months and responded to the 6-month survey. Data from the 12-month survey was not significantly different from the 6-month survey, although there were fewer respondents.
